# Supplementary material for: Lysyl oxidase (LOX) limits VSMC proliferation and neointimal thickening through its extracellular enzymatic activity
Source: Sci Rep. 2018 Sep 5;8:13258. doi: 10.1038/s41598-018-31312-w (PMC6125287; doi:10.1038/s41598-018-31312-w)
Supplement: Supplementary file 1 — Supplemental Information [file 41598_2018_31312_MOESM1_ESM.pdf]

## **SUPPLEMENTARY INFORMATION**

### **Lysyl oxidase (LOX) limits VSMC proliferation and neointimal thickening through its extracellular enzymatic activity**

Saray Varona, Mar Orriols, María Galán, Anna Guadall, Laia Cañes, Silvia Aguiló,  
Marc Sirvent, José Martínez-González, Cristina Rodríguez

## Supplementary Figure S1

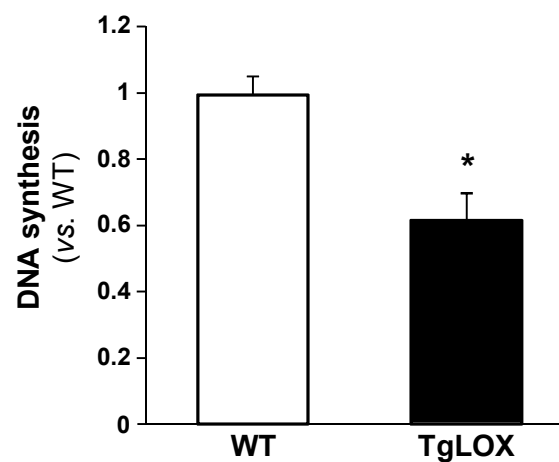

**Supplementary Fig. S1. LOX transgenesis reduces VSMC proliferative rates. A.** Aortic VSMC isolated from wild type mice (WT; white bars) or TgLOX mice (black bars) were serum-starved for 24 h and then stimulated with 20% FCS. Cell proliferation was analyzed by the [ $^3\text{H}$ ]-thymidine incorporation method. Results are represented as mean  $\pm$  SD. \* $P < 0.01$  vs. WT cells (Mann–Whitney test;  $n=5$ ).

## Supplementary Figure S2

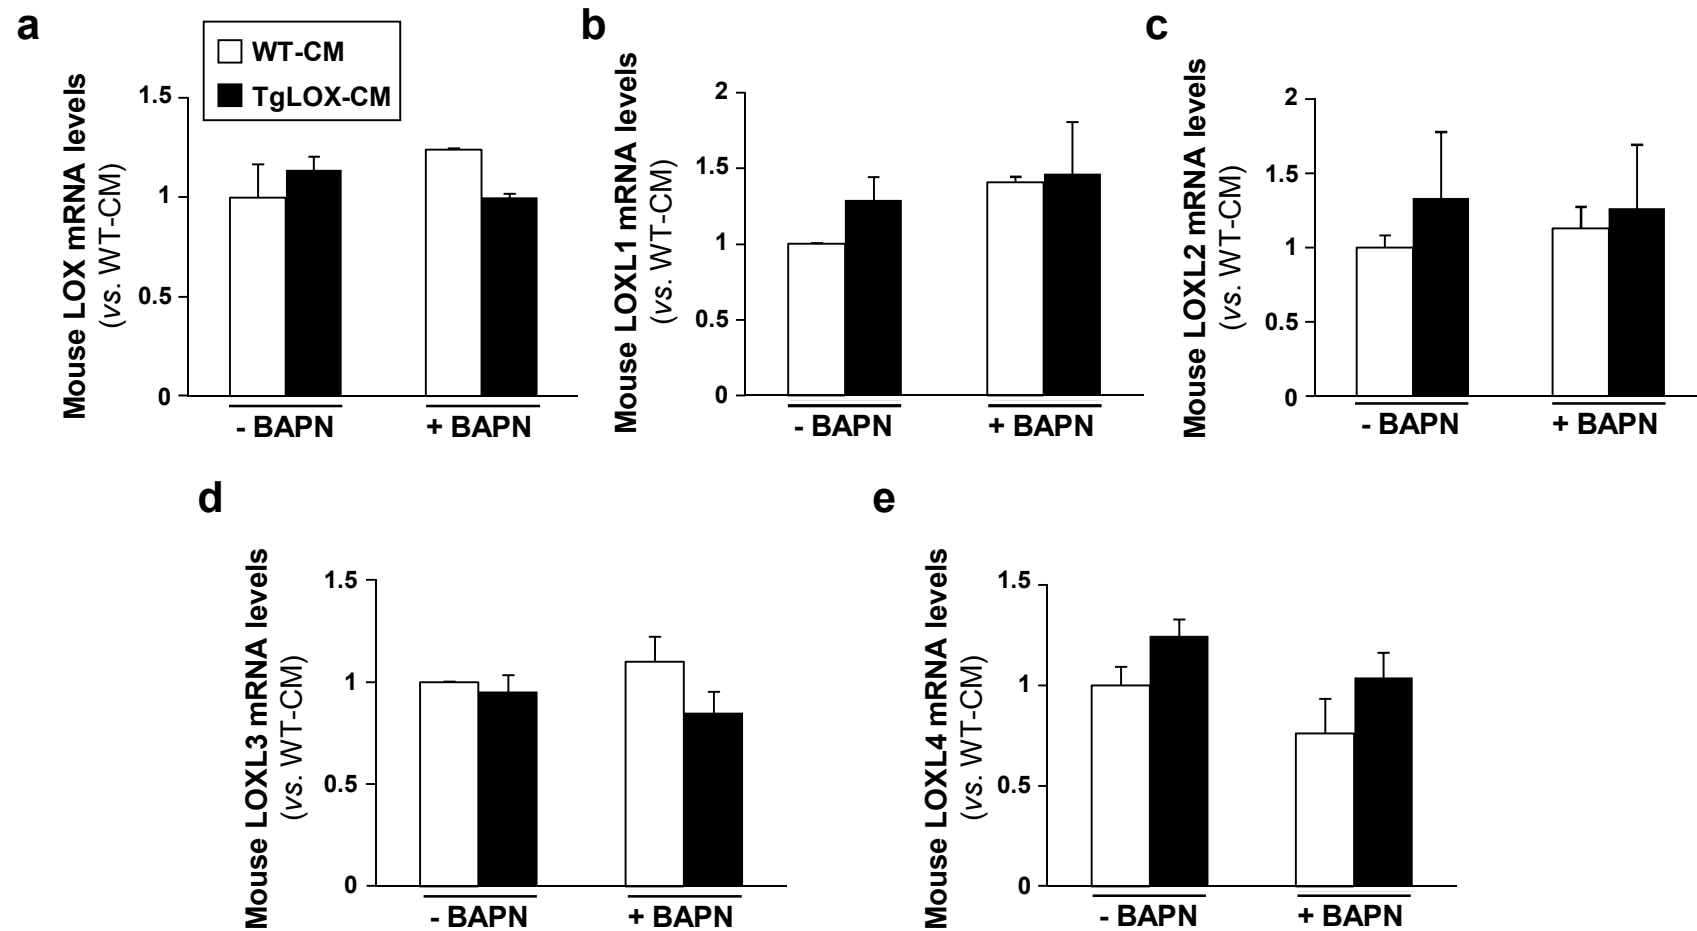

**Supplementary Fig. S2. BAPN did not alter the endogenous expression of LOX and LOXL isoenzymes.** Aortic VSMC isolated from wild type mice (WT) were serum-starved for 24 h and then exposed to conditioned media from transgenic VSMC (TgLOX-CM; black bars) or wild-type cells (WT-CM; white bars) treated or not with BAPN. LOX (**a**) and LOXLs (**b-e**) mRNA levels were analyzed by real-time PCR. Results are represented as mean  $\pm$  SD (Two-way ANOVA; n=4).

### Supplementary Figure S3

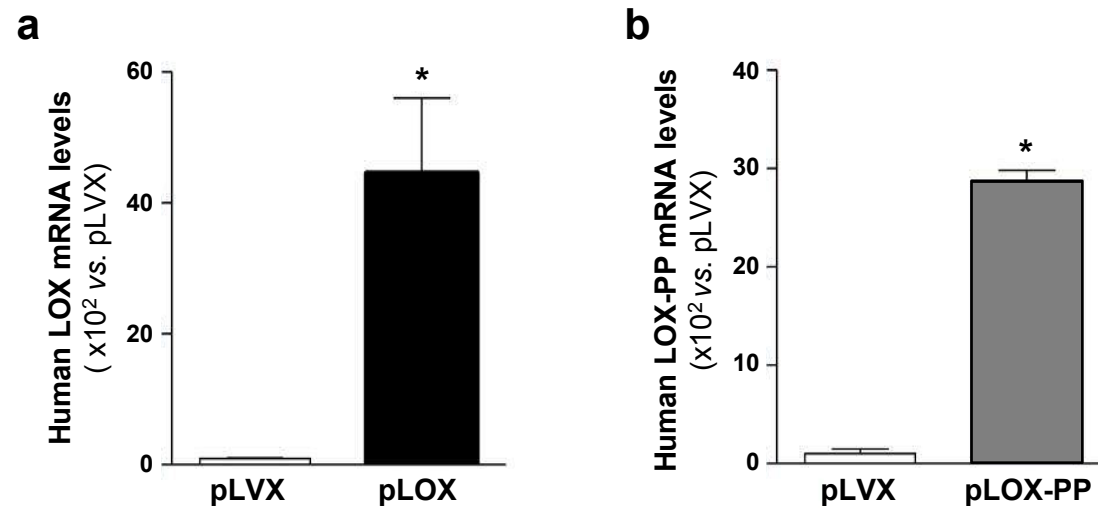

**Supplementary Fig. S3. Over-expression of LOX and LOX-PP in VSMC by lentiviral transduction.** Human VSMC were transduced with the control lentiviral vector pLVX, pLVX/LOX (pLOX) or pLVX/LOX-PP (pLOX-PP). LOX **(a)** and LOX-PP **(b)** over-expression was verified by real-time PCR. Results are represented as mean  $\pm$  SD. \* $P < 0.01$  vs. pLVX transduced cells (Mann–Whitney test;  $n = 5$ ).
